# Supplementary material for: miR-150-5p suppresses tumor progression by targeting VEGFA in colorectal cancer
Source: PubMed Central journal article supplement (PMC6286841; doi:10.18632/aging.101656), 2018-11-26
Supplement: aging-10-101656-s001.pdf [file aging-10-101656-s001.pdf]

## SUPPLEMENTARY FIGURE

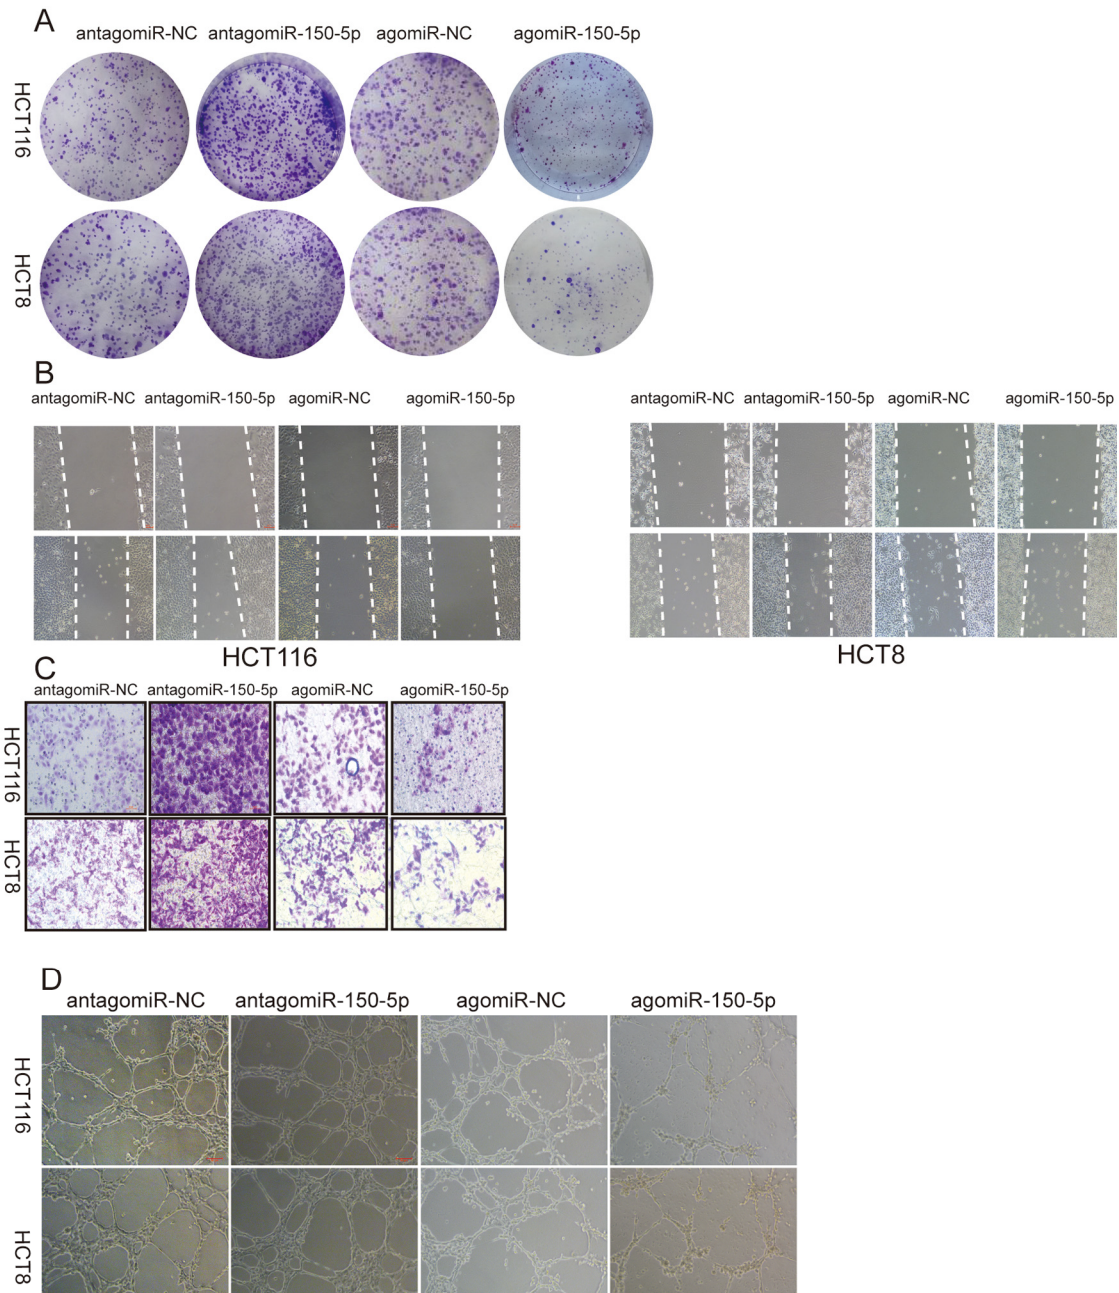

**Figure S1.** (A-D) Representative amages of colony formation(A), wound healing(B,  $\times 40$ ), transwell (C,  $\times 200$ ) and tube formation (D,  $\times 100$ ) in antagomiR-NC group, antagomiR-150-5p group, agomiR-NC group and agomiR-150-5p group.
