# Supplementary material for: miR-150-5p suppresses tumor progression by targeting VEGFA in colorectal cancer
Source: PubMed Central journal article supplement (PMC6286841; doi:10.18632/aging.101656), 2018-11-26
Supplement: aging-10-101656-s002.pdf [file aging-10-101656-s002.pdf]

**SUPPLEMENTARY MATERIALS  
AND METHODS**

**The sequence of scramble, siVEGFA-1, siVEGFA-2, agomiR-150-5p, agomiR-NC**

|                  |                              |
|------------------|------------------------------|
| scramble         | 5'-UUCUCCGAACGUGUCACGUTT-3'  |
|                  | 5'-ACGUGACACGUUCGGAGAATT-3'  |
| siVEGFA-1        | 5'-CCGAAACCAUGAACUUUCUTT-3'  |
|                  | 5'-AGAAAGUUCAUGGUUUCGGTT-3'  |
| siVEGFA-2        | 5'-GCGGCGUCGCACUGAAACUTT-3'  |
|                  | 5'-AGUUUCAGUGCGACGCCGCTT-3'  |
| agomiR-150-5p    | 5'-UCUCCCAACCCUUGUACCAGUG-3' |
|                  | 5'-CUGGUACAAGGGUUGGGAGAUU-3' |
| agomiR-NC        | 5'-UUCUCCGAACGUGUCACGUTT-3'  |
|                  | 5'-ACGUGACACGUUCGGAGAATT-3'  |
| antagomiR-150-5p | 5'-CACUGGUACAAGGGUUGGGAGA-3' |
| antagomiR-NC     | 5'-CAGUACUUUUGUGUAGUACAA-3'  |

antagomiR-150-5p and antagomiR-NC
